# Supplementary material for: International Variations in Surgical Morbidity and Mortality Post Gynaecological Oncology Surgery: A Global Gynaecological Oncology Surgical Outcomes Collaborative Led Study (GO SOAR1)
Source: MDPI journal article supplement (doi:10.3390/cancers15205001), 2023-10-16
Supplement: s1 [file s1]

## Topic guide for qualitative sub-study: GO SOAR1

### Research Aims to explore

Participating in research.  
Gynaecological Oncology Training.  
Surgical morbidity and mortality.

#### 1. Introduction

- Introduce self, research study funded by Grampian Endowment Fund, Medtronic.
- Purpose of the research.
- Introduce audio recorder.
- Stress all identifiable information will be kept confidential, but anonymised quotes may be published/presented.

#### 2. Background

- Demographics: name, age, gender, country, centre name, rural or urban setting, government funded or non-government funded institution
- Job  
*Q: What is your role in the surgical team?*  
*P: consultant/attending, fellow/registrar/resident, medical student, nurse*  
*Q: What is your role in the research team?*  
*P: principle investigator (PI), research fellow*
- Experience  
*Q: Would you consider yourself an experienced researcher?*  
*P: number of years, formal training/qualification, take part in research studies, set up and lead studies, national vs international participation*

#### 3. Research participation

- Facilitators (individual, organisational, policy related)  
*Q: Based on your experience, what motivates you to participate in research?*  
*P: authorship, making new contacts, want to improve care, recognition from the scientific/clinical community, financial gain*
- Barriers  
*Q: Based on your experience, what deters you from participating in research?*  
*P: clinical commitments/time, complicated/time consuming ethical approval process, not being invited to join studies i.e. no opportunities, research naïve, working environment/job plan not conducive to research activities, no research training, lack of resources (infrastructure, money), motivation, culture/language, research culture – low priority, COVID pandemic*
- Change  
*Q: What changes would make you more likely to take part in research?*  
*P: local, international*

#### 4. Gynaecological oncology training

- *Q: Is there formal gynae onc training?*  
*P: local or national training programme, international fellowships, no training, do other surgical specialities perform gynae onc surgery, who performs bowel/urology/reconstruction surgery – gynae onc or other specialities or gynae onc with support of other specialities*

#### 5. Surgical morbidity/mortality

- *Q: Is there anything as part of your routine clinical practice which negatively impacts on morbidity/mortality?*

*P: lack of training/knowledge on best practice guidelines, resources (eg lack of surgical expertise for complex surgery, not enough nursing staff for post op recovery, lack of medicines e.g. antibiotics), surgical training, hospital/national policies, does government consider womens health a national priority, health insurance/finances i.e. no money no care/limited care,*

- *Q: Is there anything as part of your routine clinical practice which positively impacts on morbidity/mortality?*

*P: formal training, sufficient resources, hospital/national guidelines/policies, government consider womens health a national priority, government funded health care for all – free at point of need, enhanced recovery*

- *Q: What clinical practice guidelines do you follow?*

*P: none, local, national, international (ask which ones e.g. ESGO/SGO/NCCN/BGCS/IGCS/any other)*

Final steps:

Thank the participant. Check whether they have remaining questions or comments about the topic  
Reassurance about confidentiality and anonymity  
Research team contact details should they want further information

Q-question; P-probe.
