# Supplementary material for: International Variations in Surgical Morbidity and Mortality Post Gynaecological Oncology Surgery: A Global Gynaecological Oncology Surgical Outcomes Collaborative Led Study (GO SOAR1)
Source: MDPI journal article supplement (doi:10.3390/cancers15205001), 2023-10-16
Supplement: s1 [file s1]

### **GO SOAR Collaborators (Group Authorship)**

Mohamedraed Elshami, Islamic University of Gaza, Gaza City, Palestine  
Muhammed Elhadi, Tripoli University Hospital, Tripoli, Libya  
Salah Eddine Oussama Kacimi, Abou Bakr Belkaid University of Tlemcen, Tlemcen, Algeria  
Domenico Ferraioli, Cancer Center Leon Berard, Lyon, France  
Noor Abualdhab Yarmouk University, Irbid, Jordan  
Lina Karout, American University of Beirut, Beirut, Lebanon  
Alaa Ismail, Islamic University of Gaza, Gaza City, Palestine  
Monika Sobocan, UMC Maribor, Maribor, Slovenia  
Mustafa Mohamed Ali Hussein, Omdurman military hospital, Khartoum, Sudan  
Aya Zazo, Aleppo University Hospital, Aleppo, Syria  
Glauro Baiocchi, AC Camargo Cancer Center, São Paulo, Brazil  
Bruna Triapelli Goncalves, AC Camargo Cancer Center, São Paulo, Brazil  
Ademola Adeyeye, Afe Babalola University, Ado-Ekiti, Nigeria  
Ahmad Al Hourri, Al-Bairouni University Hospital, Damascus University, Damascus, Syria  
Hasan Al Hourri, Al-Bairouni University Hospital, Damascus University, Damascus, Syria  
Marah Al Matar, Al-Bairouni University Hospital, Damascus University, Damascus, Syria  
Almu'atasim Khamees, Al-Basheer Hospital, Amman, Jordan  
Mustafa Sabri Massadi, Al-Basheer Hospital, Amman, Jordan  
Mohamad Banat, Al-Makassed Hospital, East Jerusalem, Palestine  
Omar Badaren, Al-Makassed Hospital, East Jerusalem, Palestine  
Dema Adwan, Maternity Hospital Damascus university (Al-Tawleed Hospital), Damascus, Syria  
Mustafa Albokai, Maternity Hospital Damascus university (Al-Tawleed Hospital), Damascus, Syria  
Halima.A.Sh.Alhasie, Albida Medical Centre, Faculty of Medicine, Omar Al-Mukhtar University, Al Bayda, Libya  
Wisam Abraheem Hasan, Faculty of Medicine, Omar Al-Mukhtar University, Al Bayda, Libya  
Hamdi Nawfal, Aleppo University Hospital of Obstetrics and Gynecology, Aleppo, Syria  
Amr Hamza, Aleppo University Hospital, Aleppo, Syria  
Rema Hassan Otman, Al Khadra Hospital, Tripoli, Libya  
Reyam Abdalla Naana, Al Khadra Hospital, Tripoli, Libya  
Igor Govorov, Almazov National Medical Research Centre, St Petersburg, Russia  
Elena Dikareva, Almazov National Medical Research Centre, St Petersburg, Russia  
Elena Ulrikh, Almazov National Medical Research Centre, St Petersburg, Russia  
Baraa Hajjaj, Al Shifa Hospital, Gaza City, Palestine  
Shukri Odeh Yousef, Augusta Victoria Hospital, East Jerusalem, Palestine  
Ali Al-Isawi, Babylon Maternity and Children's Hospital, Babylon, Iraq  
Alyaa Raad Al-Khafaji, Babylon Maternity and Children's Hospital, Babylon, Iraq  
Ahmed M. Abbas, Faculty of Medicine, Assiut University, Assiut, Egypt  
Mohammed F. Ramadan, Faculty of Medicine, Assiut University, Assiut, Egypt  
Mustafa M. Khodry, South Valley University, Qena, Egypt  
Mohammad Awad, Beit Jala Governmental Hospital, Beit Jala City, West Bank, Palestine  
Swali Fundaunda, Cancer Diseases Hospital, Lusaka, Zambia  
Mukatimui Munalula Kalima, Cancer Diseases Hospital, Lusaka, Zambia  
Anisse Tidjane, University of Oran 1 EHU-1st November 1954, Oran, Algeria  
Farah Shahin, Government Hospital Hebron, Hebron, Palestine  
David Atallah, Hotel Dieu de France University Hospital, Beirut, Lebanon  
Samir Tarchichi, Hotel Dieu de France University Hospital, Beirut, Lebanon  
Iman Feghali, Hotel Dieu de France University Hospital, Beirut, Lebanon  
Nadine El Kassis, Hotel Dieu de France University Hospital, Beirut, Lebanon  
Claudia Bessa Pereira Chaves, Brazilian National Cancer Institute, Rio de Janeiro, Brazil  
Daniel de Souza Fernandes, Brazilian National Cancer Institute, Rio de Janeiro, Brazil  
Ana Claudia Frazao Paiva, Brazilian National Cancer Institute, Rio de Janeiro, Brazil  
Rafaela Silva de Oliveira, Brazilian National Cancer Institute, Rio de Janeiro, Brazil  
Maen Alsumadi, Jordan Hospital, Amman, Jordan: Bushra Al Mikhi, Jordan Hospital, Amman, Jordan  
Ziena Obiedat, Jordan Hospital, Amman, Jordan  
Seda Şahin Aker, Kayseri City Education and Research Hospital, Kayseri, Türkiye  
Hüseyin Aksoy, Kayseri City Education and Research Hospital, Kayseri, Türkiye

Amer Mahmoud Sindiani, Jordan University of Science and Technology, Irbid, Jordan  
Wafa' Thani Alsardieh, Jordan University of Science and Technology, Irbid, Jordan  
Cagatay Taskiran, Koc University School of Medicine, Istanbul, Türkiye  
Burak Giray, Koc University School of Medicine, Istanbul, Türkiye  
Dogan Vatansever, Koc University School of Medicine, Istanbul, Türkiye  
Ayodeji Kayode Adefemi, Lagos State University Teaching Hospital, Lagos, Nigeria  
Ayokunle Moses Olumodeji, Lagos State University Teaching Hospital, Lagos, Nigeria  
Basel Refky, Mansoura University, Mansoura, Egypt  
Waleed Elamin, Mansoura University, Mansoura, Egypt  
Hassan Alsalkan, Mansoura University, Mansoura, Egypt  
Svetlana Kulikova, Moscow City Oncology Hospital #62, Moscow, Russia  
Pavel Sorokin, Moscow City Oncology Hospital #62, Moscow, Russia  
Dmitrii Utkin, Moscow City Oncology Hospital #62, Moscow, Russia  
Mikhail Novozhilov, Moscow City Oncology Hospital #62, Moscow, Russia  
Zarema Abduragimova, Moscow City Oncology Hospital #62, Moscow, Russia  
Zhirayr Malakyan, Nairi MC, Yerevan, Armenia  
Artem Stepanyan, Nairi MC, Yerevan, Armenia  
Areg Alaverdyan, Nairi MC, Yerevan, Armenia  
Mustafa A. Abu Jayyab, Islamic University of Gaza, Gaza City, Palestine  
Husameddin Ashraf Alattar, Islamic University of Gaza, Gaza City, Palestine  
Abdulhadi Othman Alshatshat, National Cancer Institute (Misurata), Misrata, Libya  
Hammad Ali Fadlalmola, National Ribat University Hospital, Khartoum, Sudan  
Zouhair Amarin, Jordan University of Science and Technology, Irbid, Jordan  
Hazim Ababneh, Jordan University of Science and Technology, Irbid, Jordan  
Amar Al-Jarrah, Jordan University of Science and Technology, Irbid, Jordan  
Mohammad AM Ahmed, South Valley University, Qena, Egypt  
Sara Hussein, South Valley University, Qena, Egypt  
V Annapurna, Sri Shankara cancer Hospital and research centre, Bangalore, India  
Rekha BR, Sri Shankara cancer Hospital and research centre, Bangalore, India  
Jaydip Bhaumik, Tata Medical Center, Kolkata, India  
Anik Ghosh, Tata Medical Center, Kolkata, India  
Jagannath Mishra, Tata Medical Center, Kolkata, India  
Zuheir Al-Shehabi, Tishreen University Hospital, Latakia, Syria  
Bassam Hassan, Tishreen University Hospital, Latakia, Syria  
Maherah Kamarudin, Universiti Malaya, Kuala Lumpur, Malaysia  
Chee Yang Tan, Universiti Malaya, Kuala Lumpur, Malaysia  
Mariam Anjum Ifthikar, Yenepoya Medical College Hospital, Mangalore, India  
Kiran Kumar K M, Yenepoya Medical College Hospital, Mangalore, India  
M Vijaykumar, Yenepoya Medical College Hospital, Mangalore, India  
Rohan Shetty, Yenepoya Medical College Hospital, Mangalore, India  
Jallaluddin Akbar, Yenepoya Medical College Hospital, Mangalore, India  
Ali Elimam, East Nile (Sharg Al-Neel) Hospital, Khartoum, Sudan  
Shatha Husain, The Islamic Hospital, Amman, Jordan  
Martina Arcieri, University of Messina, Messina, Italy  
Alfredo Ercoli, University of Messina, Messina, Italy  
Davide Arrigo, University of Messina, Messina, Italy  
Stefano Restaino, University Hospital of Udine, Azienda Ospedaliera Universitaria Friuli Centrale, Udine, Italy  
Giuseppe Vizzielli, University of Udine, Azienda Ospedaliera Universitaria Friuli Centrale, Udine, Italy  
Giulia Pellecchia, University of Udine, Udine, Italy  
Lorenza Driu, University of Udine, Azienda Ospedaliera Universitaria Friuli Centrale, Udine, Italy  
Matilde Degano, University of Udine, Udine, Italy  
Joao Cassanova, Champalimaud Foundation, Lisbon, Portugal  
Hospital da Luz Lisboa, Lisbon, Portugal  
Sara Proença, Champalimaud Foundation, Lisbon, Portugal  
Basile Pache, CHUV, Lausanne, Switzerland  
Patrice Mathevet, CHUV, Lausanne, Switzerland  
Renata Poncová, First Faculty of Medicine, Charles University in Prague, Czech Republic:

Christine Ang, Queen Elizabeth Hospital, Gateshead Health NHS Foundation Trust, Gateshead, UK  
Viktor Ivan Cassar, Queen Elizabeth Hospital, Gateshead Health NHS Foundation Trust, Gateshead, UK:  
Lorraine Pearce, Queen Elizabeth Hospital, Gateshead Health NHS Foundation Trust, Gateshead, UK  
Manuela Undurraga, Hôpitaux Universitaire de Genève, Geneva, Switzerland  
Benedetta Guani, MEC Centre du Sein Fribourg, Fribourg, Switzerland  
Anis Feki, MEC Centre du Sein Fribourg, Fribourg, Switzerland  
Gemma Mancebo, Hospital del Mar. PSMAR. Barcelona, Barcelona, Spain  
Berta Fabregó, Hospital del Mar. PSMAR. Barcelona, Barcelona, Spain  
Ester Miralpeix, Hospital del Mar. PSMAR. Barcelona, Spain  
Blanca Gil-Ibáñez, University Hospital 12 de Octubre, Madrid, Spain  
Alvaro Tejerizo, University Hospital 12 de Octubre, Madrid, Spain  
Gregorio López González, University Hospital 12 de Octubre, Madrid, Spain  
Manuel Pantoja-Garrido, University Hospital Virgen Macarena, Seville, Spain  
Alfredo Polo-Velasco, University Hospital Virgen Macarena, Seville, Spain  
Julia Rodríguez-Sánchez-Reyman, University Hospital Virgen Macarena, Seville, Spain  
Fabio Martinelli, Fondazione IRCCS Istituto Nazionale dei Tumori di Milano, Milan, Italy  
Chiara Cimmino, Fondazione IRCCS Istituto Nazionale dei Tumori di Milano, Milan, Italy  
Francesco Raspagliesi, Fondazione IRCCS Istituto Nazionale dei Tumori di Milano, Milan, Italy  
Martina Aida Angeles, Institut Claudius Regaud, Institut Universitaire du Cancer de Toulouse-OncoPole, Toulouse, France  
Mathilde Del, Institut Claudius Regaud, Institut Universitaire du Cancer de Toulouse-OncoPole, Toulouse, France  
Alejandra Martinez, Institut Claudius Regaud, Institut Universitaire du Cancer de Toulouse-OncoPole, Toulouse, France  
Marc Fischer, Kantonsspital St. Gallen, St Gallen, Switzerland  
Henrik Falconer, Karolinska University Hospital, Stockholm, Sweden  
Kajsa Lidman, Karolinska University Hospital, Stockholm, Sweden  
Agnieszka Rychlik, Maria Skłodowska-Curie National Research Institute of Oncology, Warsaw, Poland  
Katarzyna Derda, Maria Skłodowska-Curie National Research Institute of Oncology, Warsaw, Poland  
Mahalakshmi Gurumurthy, Aberdeen Royal Infirmary, NHS Grampian, UK  
Mary Cairns, Aberdeen Royal Infirmary, NHS Grampian, UK  
Lori McPherson, Aberdeen Royal Infirmary, NHS Grampian, UK  
Olivia W. Foley, Northwestern University Feinberg School of Medicine, Chicago, USA  
Dario R. Roque, Northwestern University Feinberg School of Medicine, Chicago, USA  
Edoardo Cola, Macerata Hospital, Macerata, Spain  
Mauro Pelagalli, Macerata Hospital, Macerata, Spain  
Andrea Papadia, Ente Ospedaliero Cantonale of Lugano (EOC), Lugano, Switzerland  
Maria Luisa Gasparri, Ente Ospedaliero Cantonale of Lugano (EOC), Lugano, Switzerland  
Anna Fagotti, Fondazione Policlinico Universitario A. Gemelli, IRCCS, Rome, Italy  
Alice Zampolini Faustini, Fondazione Policlinico Universitario A. Gemelli, IRCCS, Rome, Italy  
Giulia Ferrante, Fondazione Policlinico Universitario A. Gemelli, IRCCS, Rome, Italy  
Giovanni Scambia, Fondazione Policlinico Universitario A. Gemelli, IRCCS, Rome, Italy  
Thumuluru Kavitha Madhuri, Royal Surrey County Hospital, Royal Surrey NHS Foundation Trust, UK  
Hasanthi Assa Laarachchi, Royal Surrey County Hospital, Royal Surrey NHS Foundation Trust, UK  
Aqsa Aslam, Royal Surrey County Hospital, Royal Surrey NHS Foundation Trust, UK  
Saurabh Phadnis, The Royal London Hospital, Barts Health NHS Trust, London, UK  
Elly Brockbank, The Royal London Hospital, Barts Health NHS Trust, London, UK  
Alexandra Lawrence, The Royal London Hospital, Barts Health NHS Trust, London, UK  
Arjun Jeyarajah, The Royal London Hospital, Barts Health NHS Trust, London, UK  
James Dilley, The Royal London Hospital, Barts Health NHS Trust, London, UK  
Ranjit Manchanda, The Royal London Hospital, Barts Health NHS Trust, London, UK  
Ana Patricia Louise Alvarado, The Royal London Hospital, Barts Health NHS Trust, London, UK  
John Butler, The Royal Marsden Hospital, The Royal Marsden NHS Foundation Trust, London, UK  
Nana Gomes, The Royal Marsden Hospital, The Royal Marsden NHS Foundation Trust, London, UK  
Owen Heath, The Royal Marsden Hospital, The Royal Marsden NHS Foundation Trust, London, UK  
Marielle Nobbenuis, The Royal Marsden Hospital, The Royal Marsden NHS Foundation Trust, London, UK  
Thomas Ind, The Royal Marsden Hospital, The Royal Marsden NHS Foundation Trust, London, UK

Desmond Barton, The Royal Marsden Hospital, The Royal Marsden NHS Foundation Trust, London, UK  
Víctor Lago, University Hospital La Fe Valencia, Valencia, Spain  
Aarti Sharma, University Hospital of Wales, Cardiff and Vale University Health Board, Cardiff, UK  
Hassan Zeinah, University Hospital of Wales, Cardiff and Vale University Health Board, Cardiff, UK  
Catherine Smith, University Hospital of Wales, Cardiff and Vale University Health Board, Cardiff, UK  
Andrej Cokan, UMC Maribor, Maribor, Slovenia  
Eva Timošek, UMC Maribor, Maribor, Slovenia  
Alyssa Wield, Magee-Womens Hospital, University of Pittsburgh, Pittsburgh, USA  
Isabel Janmey, Magee-Womens Hospital, University of Pittsburgh, Pittsburgh, USA  
Natalia R. Gomez-Hidalgo, Vall d'Hebron University hospital, Barcelona, Spain  
Ana Luzarraga Aznar, Vall d'Hebron University hospital, Barcelona, Spain
