# Supplementary material for: International Variations in Surgical Morbidity and Mortality Post Gynaecological Oncology Surgery: A Global Gynaecological Oncology Surgical Outcomes Collaborative Led Study (GO SOAR1)
Source: Cancers (Basel). 2023 Oct 16;15(20):5001. doi: 10.3390/cancers15205001 (PMC10605858; doi:10.3390/cancers15205001)
Supplement: Supplementary file 1 [file cancers-15-05001-s001.zip]

Archive with 4 entries (4 files):
- Supplementary_File_S1.pdf
- Supplementary_File_S2.pdf
- Supplementary_File_S3.pdf
- supplementary_tables.pdf
